# Supplementary figures and images for: Thermally controlled growth of carbon onions within porous graphitic carbon-detonation nanodiamond monolithic composites
Source: Royal Society of Chemistry journal article supplement (doi:10.1039/c5ra00258c), 2015-01-01

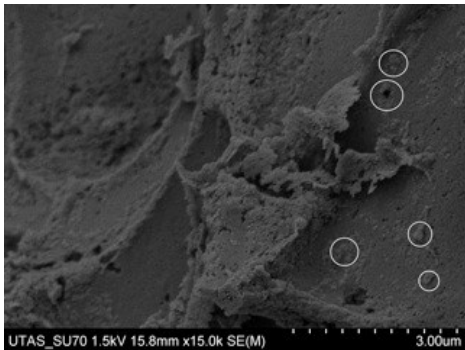

Supplement: c5ra00258c1.pdf [file c5ra00258c1.pdf]

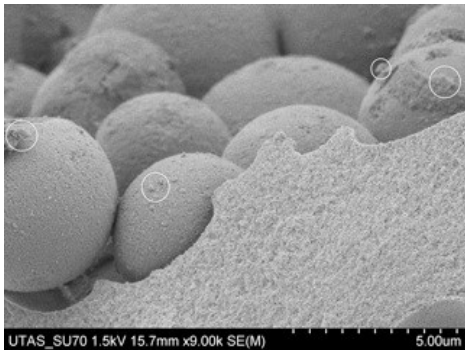

Supplement: c5ra00258c2.pdf [file c5ra00258c2.pdf]
